# Supplementary material
Source: JCI journal article supplement (doi:10.1172/jci201466)
Supplement: sd1 [file 1]

### Supplemental Information

|          | WT       | R6/2        | WT          | R6/2        | pValue   | pValue                                    |
|----------|----------|-------------|-------------|-------------|----------|-------------------------------------------|
|          | Vehicle  | Vehicle     | Metformin   | Metformin   | WTvsR6/2 | R6/2<br>Metformin<br>vs R6/2<br>Metformin |
| cGAS     | 1 ± 0.28 | 2.1 ± 0.9   | 0.98 ± 0.21 | 0.91 ± 0.44 | 0.0169   | 0.008                                     |
| STING    | 1 ± 0.36 | 1.73 ± 0.2  | 1.64 ± 0.52 | 1.08 ± 0.47 | 0.1482   | 0.2062                                    |
| IRF3     | 1 ± 0.38 | 2 ± 0.06    | 1.4 ± 0.33  | 1.31 ± 0.54 | 0.0348   | 0.1321                                    |
| IL-6     | 1 ± 0.38 | 2.43 ± 0.74 | 1.04 ± 0.22 | 1.48 ± 0.24 | 0.0036   | 0.0335                                    |
| IL-1β    | 1 ± 0.34 | 3.7 ± 1.46  | 1.12 ± 0.35 | 1.31 ± 0.22 | 0.0007   | 0.0012                                    |
| IL-18    | 1 ± 0.05 | 2.58 ± 0.1  | 1.2 ± 0.48  | 0.9 ± 0.19  | <0.0001  | <0.0001                                   |
| IFNα     | 1 ± 0.18 | 4.71 ± 2.75 | 1.43 ± 0.4  | 1.87 ± 0.92 | 0.0115   | 0.0425                                    |
| IFNβ     | 1 ± 0.5  | 4.25 ± 2.55 | 2.13 ± 1.31 | 1.69 ± 0.9  | 0.0122   | 0.0281                                    |
| B2M      | 1 ± 0.07 | 1.83 ± 0.51 | 1.16 ± 0.18 | 1.22 ± 0.34 | 0.0007   | 0.0019                                    |
| OAS1     | 1 ± 0.1  | 3.99 ± 0.49 | 1.22 ± 0.42 | 2.53 ± 0.38 | <0.0001  | 0.0013                                    |
| Clec7A   | 1 ± 0.1  | 2.26 ± 0.32 | 1.05 ± 0.53 | 0.66 ± 0.46 | 0.0041   | 0.0009                                    |
| IFI27L2A | 1 ± 0.22 | 3.59 ± 1.22 | 1.19 ± 0.45 | 2.29 ± 0.41 | 0.0015   | 0.068                                     |
| SPP1     | 1 ± 0.09 | 3.74 ± 1.14 | 0.69 ± 0.13 | 1.97 ± 0.54 | <0.0001  | 0.0016                                    |
| AXL      | 1 ± 0.17 | 0.67 ± 0.07 | 0.94 ± 0.15 | 0.62 ± 0.12 | 0.0654   | 0.9166                                    |
| TREM2    | 1 ± 0.24 | 0.76 ± 0.17 | 1.08 ± 0.24 | 0.95 ± 0.33 | 0.5306   | 0.6475                                    |
| CXCL10   | 1 ± 0.54 | 1.45 ± 0.48 | 0.58 ± 0.28 | 1.81 ± 0.35 | 0.5044   | 0.642                                     |
| IRF7     | 1 ± 0.45 | 0.7 ± 0.3   | 1.25 ± 0.6  | 1.34 ± 0.47 | 0.6917   | 0.2489                                    |
| CST7     | 1 ± 0.21 | 1.31 ± 0.39 | 1.28 ± 0.46 | 1.42 ± 0.44 | 0.5015   | 0.9107                                    |
| AIF1     | 1 ± 0.34 | 1.02 ± 0.23 | 1.09 ± 0.27 | 0.87 ± 0.11 | 0.9851   | 0.6196                                    |
| PSD95    | 1 ± 0.07 | 0.57 ± 0.07 | 0.76 ± 0.26 | 0.72 ± 0.1  | 0.0079   | 0.3116                                    |
| Homer1   | 1 ± 0.12 | 0.58 ± 0.08 | 0.89 ± 0.18 | 0.77 ± 0.14 | 0.0031   | 0.1959                                    |
| SYP      | 1 ± 0.03 | 1.16 ± 0.15 | 1 ± 0.13    | 1.28 ± 0.28 | 0.5607   | 0.7352                                    |
| SYN1     | 1 ± 0.17 | 1.13 ± 0.16 | 0.96 ± 0.21 | 1 ± 0.23    | 0.7672   | 0.7695                                    |
| C1qB     | 1 ± 0.44 | 2.27 ± 0.2  | 1.33 ± 0.13 | 1.42 ± 0.36 | 0.0036   | 0.0238                                    |
| C4B      | 1 ± 0.13 | 3.12 ± 0.36 | 1.14 ± 0.23 | 1.49 ± 0.07 | <0.0001  | 0.0002                                    |
| C3       | 1 ± 0.23 | 1.02 ± 0.04 | 0.79 ± 0.15 | 0.71 ± 0.26 | 0.9836   | 0.1769                                    |

**Supplemental Table 1. Quantitative gene expression analysis in the cortex of WT and R6/2 mouse brain.** The table shows relative mRNA expression levels of analyzed genes expressed as fold change (mean ± SD). Gene expression was measured by quantitative real-time PCR (qPCR) and calculated using the  $\Delta\Delta C_t$  method with  $\beta$ -actin as the endogenous normalization control, n=3-5. Statistical significance was determined by two-way ANOVA with comparisons between WT vs R6/2 and R6/2 vs R6/2 ± metformin. Corresponding *P* values are indicated.

|          | WT       | R6/2         | WT          | R6/2        | pValue   | pValue                           |
|----------|----------|--------------|-------------|-------------|----------|----------------------------------|
|          | Vehicle  | Vehicle      | Metformin   | Metformin   | WTvsR6/2 | R6/2 Metformin vs R6/2 Metformin |
| cGAS     | 1 ± 0.46 | 2.91 ± 0.52  | 1.08 ± 0.42 | 1.3 ± 0.34  | 0.0004   | 0.0009                           |
| STING    | 1 ± 0.21 | 3.54 ± 0.73  | 1.13 ± 0.25 | 1.74 ± 0.5  | <0.0001  | 0.0002                           |
| IRF3     | 1 ± 0.3  | 6.03 ± 2.08  | 0.84 ± 0.35 | 2.18 ± 0.77 | 0.0001   | 0.0006                           |
| IL-6     | 1 ± 0.21 | 3.85 ± 1.5   | 1.32 ± 0.5  | 1.64 ± 0.25 | 0.0008   | 0.0035                           |
| IL-1β    | 1 ± 0.35 | 3.39 ± 0.13  | 1.09 ± 0.11 | 2.46 ± 0.45 | 0.0001   | 0.019                            |
| IL-18    | 1 ± 0.11 | 5.42 ± 0.42  | 1.23 ± 0.23 | 2.12 ± 1.19 | <0.0001  | 0.0001                           |
| IFNα     | 1 ± 0.15 | 4.34 ± 1.39  | 1.22 ± 0.44 | 1.89 ± 0.84 | 0.0002   | 0.0026                           |
| IFNβ     | 1 ± 0.33 | 8.68 ± 3.72  | 2.15 ± 0.74 | 2.76 ± 0.64 | 0.0004   | 0.002                            |
| B2M      | 1 ± 0.1  | 2.08 ± 0.45  | 1.06 ± 0.28 | 1.57 ± 0.34 | 0.0003   | 0.0187                           |
| OAS1     | 1 ± 0.34 | 9.57 ± 3.89  | 1.28 ± 0.63 | 3.14 ± 1.75 | 0.0001   | 0.001                            |
| Clec7A   | 1 ± 0.05 | 2.6 ± 0.91   | 0.73 ± 0.32 | 1.4 ± 0.29  | 0.0039   | 0.0181                           |
| IFI27L2A | 1 ± 0.19 | 12.13 ± 2.32 | 1.98 ± 0.98 | 4.19 ± 1.23 | <0.0001  | <0.0001                          |
| SPP1     | 1 ± 0.41 | 4.49 ± 1.7   | 1.55 ± 1.15 | 1.78 ± 0.7  | 0.0059   | 0.0214                           |
| AXL      | 1 ± 0.31 | 0.46 ± 0.06  | 1.01 ± 0.84 | 0.62 ± 0.14 | 0.3409   | 0.8958                           |
| TREM2    | 1 ± 0.27 | 1.58 ± 0.75  | 0.89 ± 0.16 | 0.93 ± 0.15 | 0.2974   | 0.23                             |
| CXCL10   | 1 ± 0.58 | 14.46 ± 9.43 | 2.11 ± 1.05 | 3.91 ± 1.65 | 0.0036   | 0.0144                           |
| IRF7     | 1 ± 0.23 | 10.16 ± 3.58 | 1.29 ± 0.32 | 5.22 ± 0.93 | <0.0001  | 0.0047                           |
| CST7     | 1 ± 0.37 | 7.14 ± 5.3   | 0.95 ± 0.49 | 2.04 ± 0.46 | 0.0643   | 0.119                            |
| PSD95    | 1 ± 0.2  | 0.48 ± 0.09  | 1.06 ± 0.77 | 0.59 ± 0.14 | 0.3038   | 0.9346                           |
| Homer1   | 1 ± 0.35 | 0.31 ± 0.03  | 0.62 ± 0.3  | 0.42 ± 0.12 | 0.0225   | 0.829                            |
| SYP      | 1 ± 0.36 | 0.68 ± 0.1   | 0.99 ± 0.88 | 0.85 ± 0.16 | 0.7007   | 0.897                            |
| SYN1     | 1 ± 0.41 | 0.27 ± 0.06  | 0.57 ± 0.36 | 0.69 ± 0.13 | 0.0254   | 0.1763                           |
| C1qA     | 1 ± 0.21 | 1.95 ± 0.42  | 1.28 ± 0.29 | 1.39 ± 0.32 | 0.0219   | 0.1446                           |
| C1qB     | 1 ± 0.34 | 2.63 ± 0.51  | 1.57 ± 0.35 | 1.46 ± 0.22 | 0.0049   | 0.0232                           |

|     |          |            |             |             |        |        |
|-----|----------|------------|-------------|-------------|--------|--------|
| C4B | 1 ± 0.38 | 4.1 ± 2.27 | 1.67 ± 0.14 | 1.73 ± 0.16 | 0.0261 | 0.0736 |
| C3  | 1 ± 1.13 | 1.3 ± 0.03 | 1.04 ± 0.55 | 0.72 ± 0.15 | 0.8592 | 0.5843 |

**Supplemental Table 2. Quantitative gene expression analysis in the striatum of WT and R6/2 mouse brain.** The table shows relative mRNA expression levels of analyzed genes expressed as fold change (mean ± SD). Gene expression was measured by quantitative real-time PCR (qPCR) and calculated using the  $\Delta\Delta C_t$  method with  $\beta$ -actin as the endogenous normalization control, n=3-5. Statistical significance was determined by two-way ANOVA with comparisons between WT vs R6/2 and R6/2 vs R6/2 ± metformin. Corresponding *P* values are indicated.

|       | WT Vehicle | R6/2 Vehicle | WT Metformin | R6/2 Metformin | pValue WTvsR6/2 | pValue R6/2 Metformin vs R6/2 Metformin |
|-------|------------|--------------|--------------|----------------|-----------------|-----------------------------------------|
| GLUT1 | 1 ± 0.18   | 1.76 ± 0.39  | 0.88 ± 0.12  | 1.23 ± 0.07    | 0.0032          | 0.0248                                  |
| GLUT3 | 1 ± 0.14   | 1.33 ± 0.45  | 0.97 ± 0.12  | 1.08 ± 0.11    | 0.2222          | 0.3905                                  |
| HK1   | 1 ± 0.06   | 1.67 ± 0.18  | 0.94 ± 0.15  | 1.15 ± 0.13    | 0.0003          | 0.0015                                  |
| HK2   | 1 ± 0.16   | 1.84 ± 0.28  | 1.06 ± 0.08  | 1.43 ± 0.1     | <0.0001         | 0.0095                                  |
| PFKM  | 1 ± 0.13   | 0.91 ± 0.38  | 0.89 ± 0.09  | 0.98 ± 0.1     | 0.8327          | 0.9043                                  |
| PFKP  | 1 ± 0.12   | 1.43 ± 0.2   | 0.88 ± 0.14  | 1.05 ± 0.05    | 0.0022          | 0.0051                                  |
| ALDOA | 1 ± 0.12   | 1.23 ± 0.22  | 0.92 ± 0.08  | 1.14 ± 0.09    | 0.0977          | 0.6246                                  |
| TPI   | 1 ± 0.25   | 1.39 ± 0.13  | 1.17 ± 0.16  | 1.21 ± 0.09    | 0.0253          | 0.3536                                  |
| GAPDH | 1 ± 0.18   | 1.54 ± 0.16  | 1.08 ± 0.13  | 1.21 ± 0.1     | 0.0021          | 0.0332                                  |
| PGK1  | 1 ± 0.27   | 1.38 ± 0.15  | 1.2 ± 0.11   | 1.53 ± 0.04    | 0.0284          | 0.4623                                  |
| PGAM  | 1 ± 0.24   | 1.59 ± 0.15  | 1.2 ± 0.12   | 1.08 ± 0.2     | 0.0021          | 0.0054                                  |
| ENO1  | 1 ± 0.22   | 1.53 ± 0.16  | 1.03 ± 0.2   | 1.35 ± 0.08    | 0.0001          | 0.0771                                  |
| ENO2  | 1 ± 0.13   | 1.59 ± 0.17  | 1.43 ± 0.21  | 1.41 ± 0.05    | <0.0001         | 0.0802                                  |
| PKM   | 1 ± 0.27   | 1.67 ± 0.13  | 1.27 ± 0.1   | 1.2 ± 0.22     | 0.0033          | 0.0248                                  |
| LDHA  | 1 ± 0.17   | 1.83 ± 0.13  | 0.91 ± 0.22  | 0.91 ± 0.45    | 0.0054          | 0.0029                                  |
| LDHB  | 1 ± 0.33   | 1.73 ± 0.61  | 0.94 ± 0.34  | 0.63 ± 0.16    | 0.0459          | 0.0052                                  |
| PDK1  | 1 ± 0.29   | 2.33 ± 0.65  | 1.48 ± 0.89  | 2.47 ± 1.84    | 0.155           | 0.9735                                  |
| PDK2  | 1 ± 0.77   | 1.07 ± 0.3   | 0.94 ± 0.47  | 1.22 ± 0.5     | 0.9779          | 0.9148                                  |
| PDK3  | 1 ± 0.52   | 1.52 ± 0.39  | 0.87 ± 0.39  | 1.35 ± 0.31    | 0.2384          | 0.8356                                  |
| PDK4  | 1 ± 0.28   | 1.92 ± 0.46  | 0.82 ± 0.36  | 1.28 ± 0.26    | 0.0084          | 0.0516                                  |
| PDP1  | 1 ± 0.58   | 0.62 ± 0.16  | 1.19 ± 0.76  | 0.9 ± 0.12     | 0.5224          | 0.695                                   |
| PDP2  | 1 ± 0.3    | 0.53 ± 0.14  | 1.45 ± 0.49  | 1.01 ± 0.31    | 0.17            | 0.1558                                  |
| PDHA1 | 1 ± 0.43   | 0.61 ± 0.2   | 1.36 ± 0.43  | 1.08 ± 0.29    | 0.3097          | 0.2019                                  |
| PDHB  | 1 ± 0.37   | 0.65 ± 0.26  | 1.11 ± 0.08  | 1.01 ± 0.31    | 0.1553          | 0.1393                                  |

|        |          |             |             |             |        |        |
|--------|----------|-------------|-------------|-------------|--------|--------|
| PDHX   | 1 ± 0.37 | 0.58 ± 0.2  | 1.48 ± 0.43 | 1.2 ± 0.34  | 0.2296 | 0.0635 |
| CS     | 1 ± 0.35 | 0.5 ± 0.16  | 1.24 ± 0.38 | 0.94 ± 0.28 | 0.0924 | 0.1387 |
| ACO2   | 1 ± 0.34 | 0.35 ± 0.1  | 1.2 ± 0.39  | 0.73 ± 0.08 | 0.0199 | 0.1754 |
| IDH2   | 1 ± 0.24 | 0.61 ± 0.21 | 1.44 ± 0.62 | 0.98 ± 0.18 | 0.3234 | 0.3543 |
| OGDH   | 1 ± 0.16 | 1.05 ± 0.17 | 1.13 ± 0.31 | 0.75 ± 0.11 | 0.9455 | 0.1513 |
| SUCLA1 | 1 ± 0.23 | 1.77 ± 0.12 | 0.94 ± 0.09 | 1.05 ± 0.23 | 0.001  | 0.0015 |
| SUCLA2 | 1 ± 0.19 | 1.61 ± 0.36 | 0.96 ± 0.22 | 1.2 ± 0.48  | 0.0916 | 0.2945 |
| SDHA   | 1 ± 0.35 | 1.95 ± 0.72 | 0.76 ± 0.28 | 1.16 ± 0.38 | 0.031  | 0.0689 |
| SDHB   | 1 ± 0.53 | 0.57 ± 0.07 | 0.8 ± 0.13  | 0.86 ± 0.25 | 0.1393 | 0.3687 |
| SDHC   | 1 ± 0.24 | 1.81 ± 0.35 | 1.23 ± 0.1  | 1.32 ± 0.47 | 0.0232 | 0.1691 |
| SDHD   | 1 ± 0.08 | 1.98 ± 0.64 | 1.07 ± 0.34 | 1.51 ± 0.37 | 0.0038 | 0.1336 |

**Supplemental Table 3. Effect of Metformin on gene expression of metabolic pathways in the striatum of WT and R6/2 mouse brain.** The table summarizes relative mRNA expression levels of genes involved in glycolysis, pyruvate-to-acetyl-CoA conversion, and the electron transport chain, expressed as fold change (mean ± SD). Gene expression was quantified by quantitative real-time PCR (qPCR) and calculated using the  $\Delta\Delta C_t$  method with  $\beta$ -actin as the endogenous normalization control, n=4. Statistical analysis was performed using two-way ANOVA, with comparisons between WT vs R6/2 and R6/2 vs R6/2 ± metformin. Corresponding *P* values are provided.

| Type    | Grade | Specimen | Age | Gender | CAG repeats | Standard brain block (SBB)(64) | Postmortem interval before frozen |
|---------|-------|----------|-----|--------|-------------|--------------------------------|-----------------------------------|
| Control | n.a.  | T-110    | 62  | M      | N.E.        | SBB7.1                         | N.E.                              |
| Control | n.a.  | T-133    | 33  | F      | N.E.        | SBB7.1                         | 11:25                             |
| Control | n.a.  | T-169    | 69  | M      | N.E.        | SBB6.2                         | 49:20                             |
| Control | n.a.  | T-180    | 52  | F      | N.E.        | SBB7.2                         | 6:07                              |
| Control | n.a.  | T-638    | 78  | M      | N.E.        | SBB7.1                         | 8:00                              |
| HD2     | 2     | T-461    | 77  | M      | 41/15       | SBB7.2                         | 19:28                             |
| HD2     | 2     | T-3221   | 58  | M      | 42/15       | SBB7.2                         | 85:11                             |
| HD2     | 2     | T-4394   | 75  | F      | 41/17       | SBB7.2                         | 22:50                             |
| HD2     | 2     | T-4498   | 59  | M      | 43/17       | SBB6.2                         | 32:45                             |
| HD2     | 2     | T-4964   | 89  | M      | 40/17       | SBB6.0                         | 10:35                             |

**Supplemental Table 4: Characteristics of human samples:** Grade-diagnosed HD grade, Specimen-frozen tissue samples, Age-years at death, F; female, M; male, N.E; not estimated, n.a; not applicable, CAG repeats - number of CAG repeats of both alleles.

| Oligonucleotide/Primers sequence |                                     |
|----------------------------------|-------------------------------------|
| mt-CO1                           | FP; 5'-GCCCCAGATATAGCATTCCC-3'      |
|                                  | RP; 5'-GTTCATCCTGTTCTGCTCC-3'       |
| mt-Dloop1                        | FP; 5'-AATCTACCATCCTCCGTGAAACC-3'   |
|                                  | RP; 5'-TCAGTTTAGCTACCCCCAAGTTTAA-3' |
| mt-Dloop3                        | FP; 5'-TCCTCCGTGAAACCAACAA-3'       |
|                                  | RP; 5'-AGCGAGAAGAGGGGCATT-3'        |
| cGAS                             | FP; 5'-ACCGGACAAGCTAAAGAAGGTGCT-3'  |
|                                  | RP; 5'-GCAGCAGGCGTTCACAACCTTAT-3'   |
| STING                            | FP; 5'-GTCCTCTATAAGTCCCTAAGCATG-3'  |
|                                  | RP; 5'-AAGATCAACCGCAAGTACCC-3'      |
| IRF3                             | FP; 5'-CACAAGGACAAGGACGGAG-3'       |
|                                  | RP; 5'-ATGCAGAACCACAGAGTGTAG-3'     |
| IL-6                             | FP; 5'-CCACTCACCTCTCAGAACG-3'       |
|                                  | RP; 5'-CATCTTTGGAAGGTTCAGGTTG-3'    |
| IL-1 $\beta$                     | FP; 5'-ACGGACCCAAAAGATGAAG-3'       |
|                                  | RP; 5'-TTCTCCACAGCCACAATGAG-3'      |
| IL-18                            | FP; 5'-GCCTCAAACCTTCCAATCAC-3'      |
|                                  | RP; 5'-GTTGTCTGATTCCAGGTCTCC-3'     |
| IFN- $\alpha$                    | FP; 5'-TCTGTGCTTTCCTGATGGTC-3'      |
|                                  | RP; 5'-GGTTATGAGTCTGAGGAAGGTC-3'    |
| IFN- $\beta$                     | FP; 5'-CAGCCCTCTCCATCAACTATAAG-3'   |
|                                  | RP; 5'-TCTCCGTCATCTCCATAGGG-3'      |
| PSD95                            | FP; 5'-GTGACAACCAAGAAATACCGC-3'     |
|                                  | RF; 5'-TTCACCTGCAACTCATATCCTG-3'    |
| Synaptophysin                    | FP; 5'-AGTGCCTCAACATCGAAG-3'        |
|                                  | RP; 5'-GCCACGGTGACAAAGAATTC-3'      |
| Homer-1                          | FP; 5'-CAGAGCAAGTTTTATTGGGC-3'      |
|                                  | RP; 5'-TGTGTTCCGGTCAATCTGG-3'       |
| B2M                              | FP; 5'-TGGTCTTCTGGTGCTTGTG-3'       |
|                                  | RP; 5'-GGGTGGAAGTGTGTTACGTAG-3'     |
| OAS1                             | FP; 5'-GGGAGACAAGAGATTCAGAAGG-3'    |
|                                  | RP; 5'-CCAGGCAGCTAAGACAAGAG-3'      |
| Clec7A                           | FP; 5'-CTTTAGATGAGAAGGTGGCTCC-3'    |
|                                  | RP; 5'-GTGTCTTTACTTCCATACCAGG-3'    |
| IFI27L2A                         | FP; 5'-GCCCCGACAAATCCACTCAG-3'      |
|                                  | RP; 5'-CCGATTAACACTCAGAACCCTC-3'    |
| SPP1                             | FP; 5'-GTGATTTGCTTTTGCCTGTTTG-3'    |
|                                  | RP; 5'-GAGATTCTGCTTCTGAGATGGG-3'    |
| AXL                              | FP; 5'-GTGAAAGAGGTGAACTGGTAG-3'     |
|                                  | RP; 5'-GTCTCGTAGTTTCTCCTTCAGC-3'    |
| TREM2                            | FP; 5'-GCAGGGTTATGAGTGACAGTTG-3'    |
|                                  | RP; 5'-GTTGAGGGCTTGGGACAG-3'        |
| CXCL10                           | FP; 5'-TCAGCACCATGAACCCAAG-3'       |
|                                  | RP; 5'-CTATGGCCCTCATTCTCACTG-3'     |
| IRF7                             | FP; 5'-TTGATCCGCATAAGGTGTACG-3'     |
|                                  | RP; 5'-TTCCCTATTTCCGTGGCTG-3'       |
| CST7                             | FP; 5'-CTGCCTAACTTCTGACACCC-3'      |
|                                  | RP; 5'-CACTCCTGGGTTATTGGTCTC-3'     |
| AIF1                             | FP; 5'-CGATGATCCCAAATACAGCAATG-3'   |
|                                  | RP; 5'-CCCAAGTTTCTCCAGCATTTC-3'     |
| SYN1                             | FP; 5'-CTGACAACCTTCTCTGGCTCTG-3'    |
|                                  | RP; 5'-AGGTAAGAGCAGTCTCGGTG-3'      |

|                |                                  |
|----------------|----------------------------------|
| C1qB           | FP; 5'-GGGTCCTGGCTCTGATG-3'      |
|                | RP; 5'-CTCCAAACTCACCAAGGTCTC-3'  |
| C4b            | FP; 5'-GAAGGAAACAGCAAAGGCAC-3'   |
|                | RP; 5'-TCGTAGTCTTCATTGGCATCC-3'  |
| C3             | FP; 5'-CTTAAGGTGAGGGTGGAACTG-3'  |
|                | RP; 5'-GGGACAATGACATACGGTACAG-3' |
| C1qA           | FP; 5'-CTGAAGATGTCTGCCGAGC-3'    |
|                | RP; 5'-CCCCTGGGTCTCCTTTAAAAC-3'  |
| $\beta$ -Actin | FP; 5'-ACCTTCTACAATGAGCTGCG-3'   |
|                | RP; 5'-CTGGATGGCTACGTACATGG-3'   |

**Supplemental Table 5. Sequences of qPCR primers used in this study.** FP: Forward Primer, RP: Reverse Primer

| <b>Antibody</b> | <b>Catalogue</b>          | <b>Vendor</b> |
|-----------------|---------------------------|---------------|
| IBA 1           | Proteintech               | 81728-1-RR    |
| CD16            | Cell Signaling Technology | #80366        |
| ASC             | Cell Signaling Technology | #67824        |
| HS1             | Cell Signaling Technology | #3892         |
| CD68            | Proteintech               | 28058-1-AP    |
| CD86            | Proteintech               | 26903-1-AP    |
| iNOS            | Proteintech               | 22226-1-AP    |
| $\beta$ -actin  | Proteintech               | 66009-1-Ig    |
| Hexokinase 1    | Cell Signaling Technology | #2024         |
| Hexokinase 2    | Cell Signaling Technology | #2867         |
| PFKFB3          | Cell Signaling Technology | #13045        |
| PKM2            | Cell Signaling Technology | #4053         |
| PDHK1           | Cell Signaling Technology | #3820         |
| PFKP            | Cell Signaling Technology | #8164         |
| Aldolase A      | Cell Signaling Technology | #8060         |
| PDH             | Cell Signaling Technology | #3205         |
| LDHA            | Cell Signaling Technology | #3582         |
| DRP1            | Proteintech               | 12957-1-AP    |
| pDRP1           | Cell Signaling Technology | #4494         |
| MFF             | Proteintech               | 17090-1-AP    |
| pMFF            | Proteintech               | #36177        |
| IL-1 $\beta$    | Proteintech               | 16806-1-AP    |

**Supplemental Table 6. Information on antibodies used in this study**

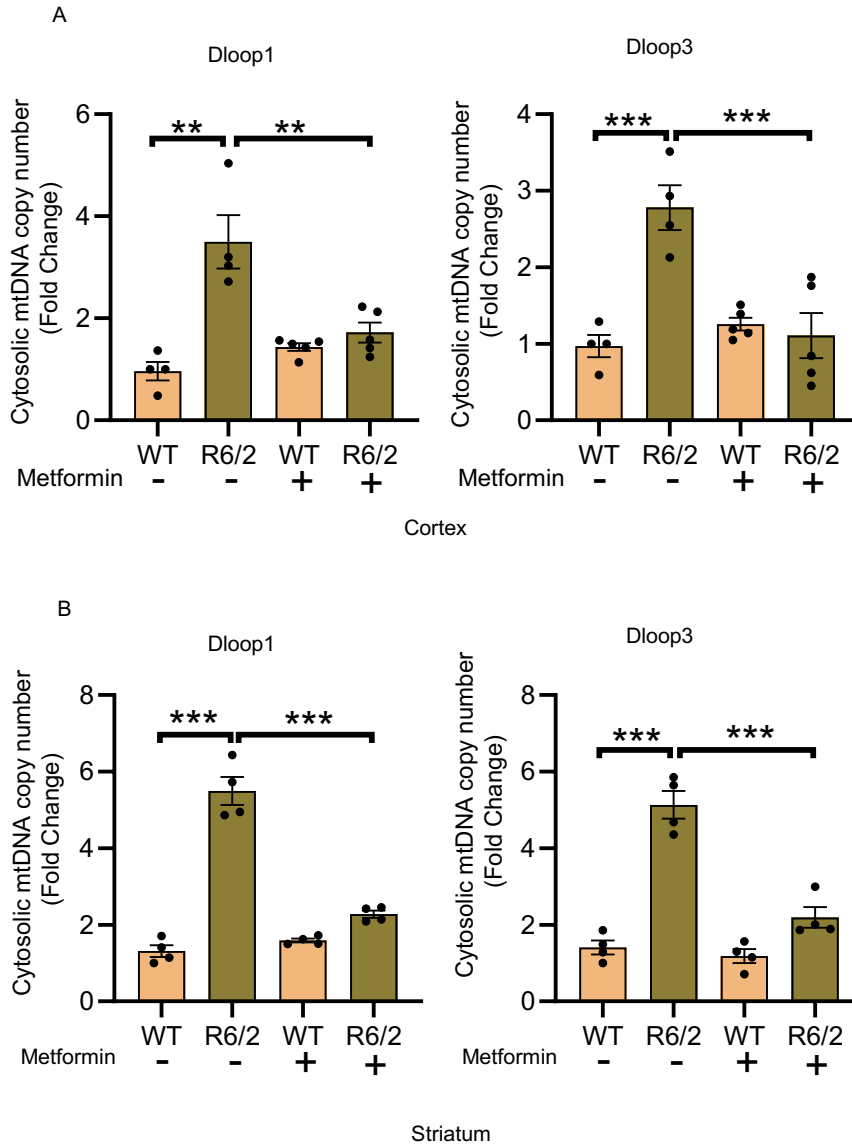

**Supplemental Figure 1. Metformin regulates mtDNA release in R6/2 mice:** (A) Quantification of cytosolic mtDNA in WT and R6/2 cortex treated with or without metformin (200 mg/kg b.wt) using primers against mitochondrial genes Dloop1 and Dloop3 in R6/2 cortex, n=4 in vehicle group, n=5 metformin group and (B) striatum. Data is represented as  $\pm$ SEM. Individual data points in the graph represent an independent biological repeat, n=4. Data was analyzed by two-way ANOVA followed by Tukey's test. \*\*p < 0.01; \*\*\*p < 0.001.

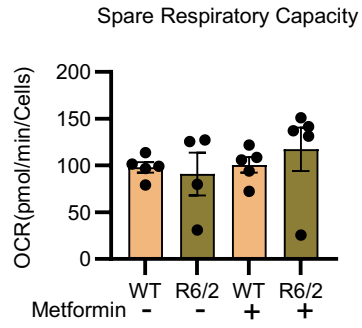

**Supplemental Figure 2. Metformin reprograms microglial metabolism.** Quantification of spare respiratory capacity in WT and R6/2 primary microglia treated with or without metformin (25  $\mu$ M) for 72 hours by Real-time oxygen consumption rate (OCR) experiment (Figure 6c), n=5. OCR was measured using a Seahorse XF96e analyzer. Data are presented as mean  $\pm$  SEM and analyzed by two-way ANOVA followed by Tukey's test.

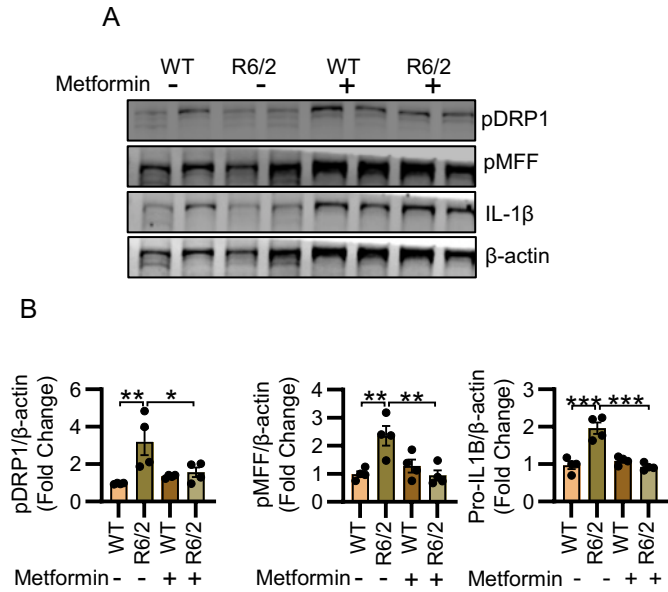

**Supplemental Figure 3. Metformin modulates mitochondrial fission in R6/2 striatum (A)** Representative immunoblot images of pMFF, IL1 $\beta$  and  $\beta$ -actin and their (B) normalized expression level in striatum of WT and R6/2 mice treated with metformin or vehicle. N=4. Data is represented as  $\pm$ SEM. Individual data points in the graph represent an independent biological repeat. Data was analyzed by two-way ANOVA followed by Tukey's test. \* $p < 0.05$ ; \*\* $p < 0.01$ ; \*\*\* $p < 0.001$ ; ns, not significant.
