# Supplementary material
Source: JCI journal article supplement (doi:10.1172/jci201466)

Figure 2 C

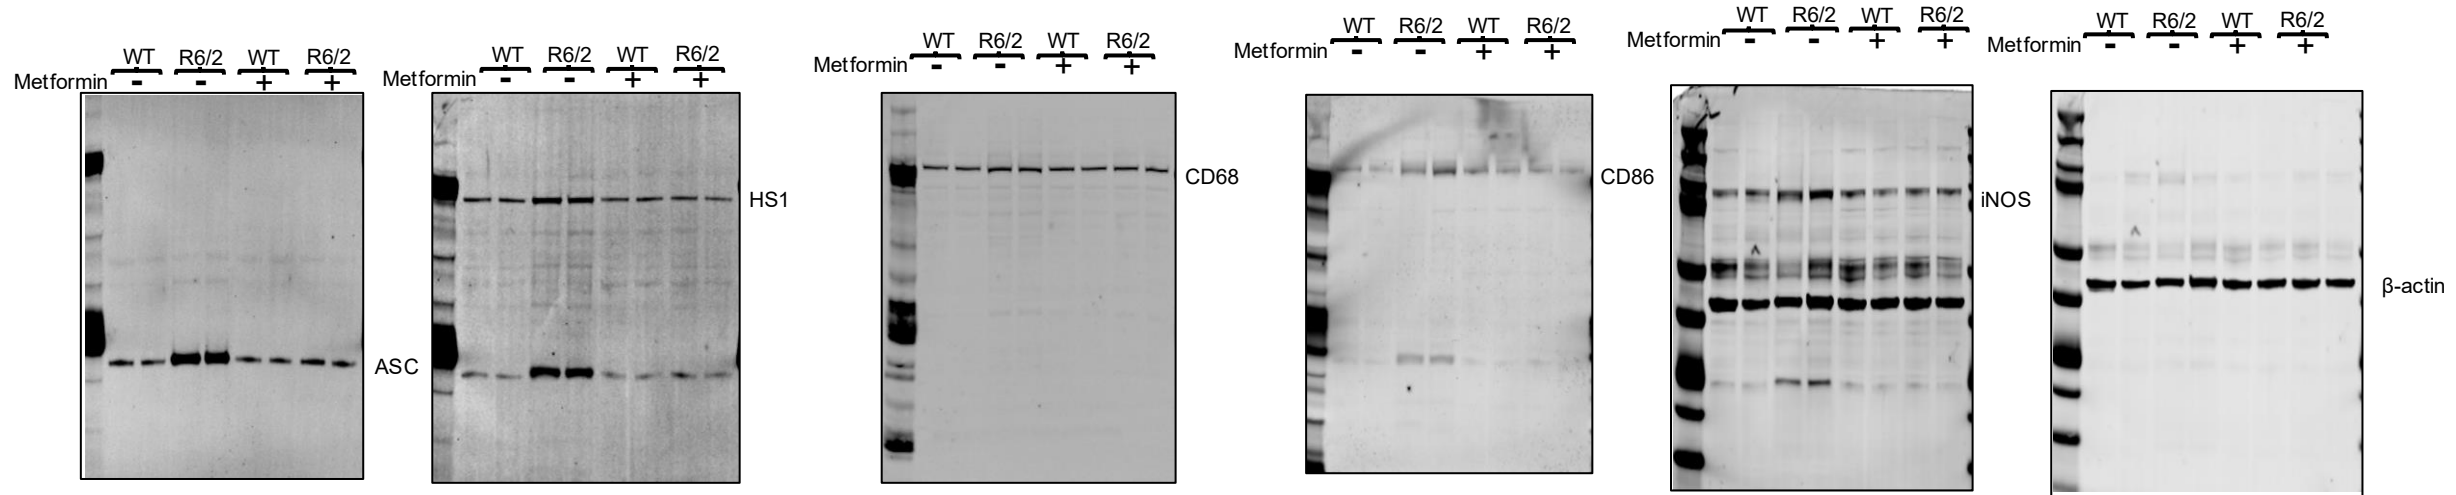

Figure 4E

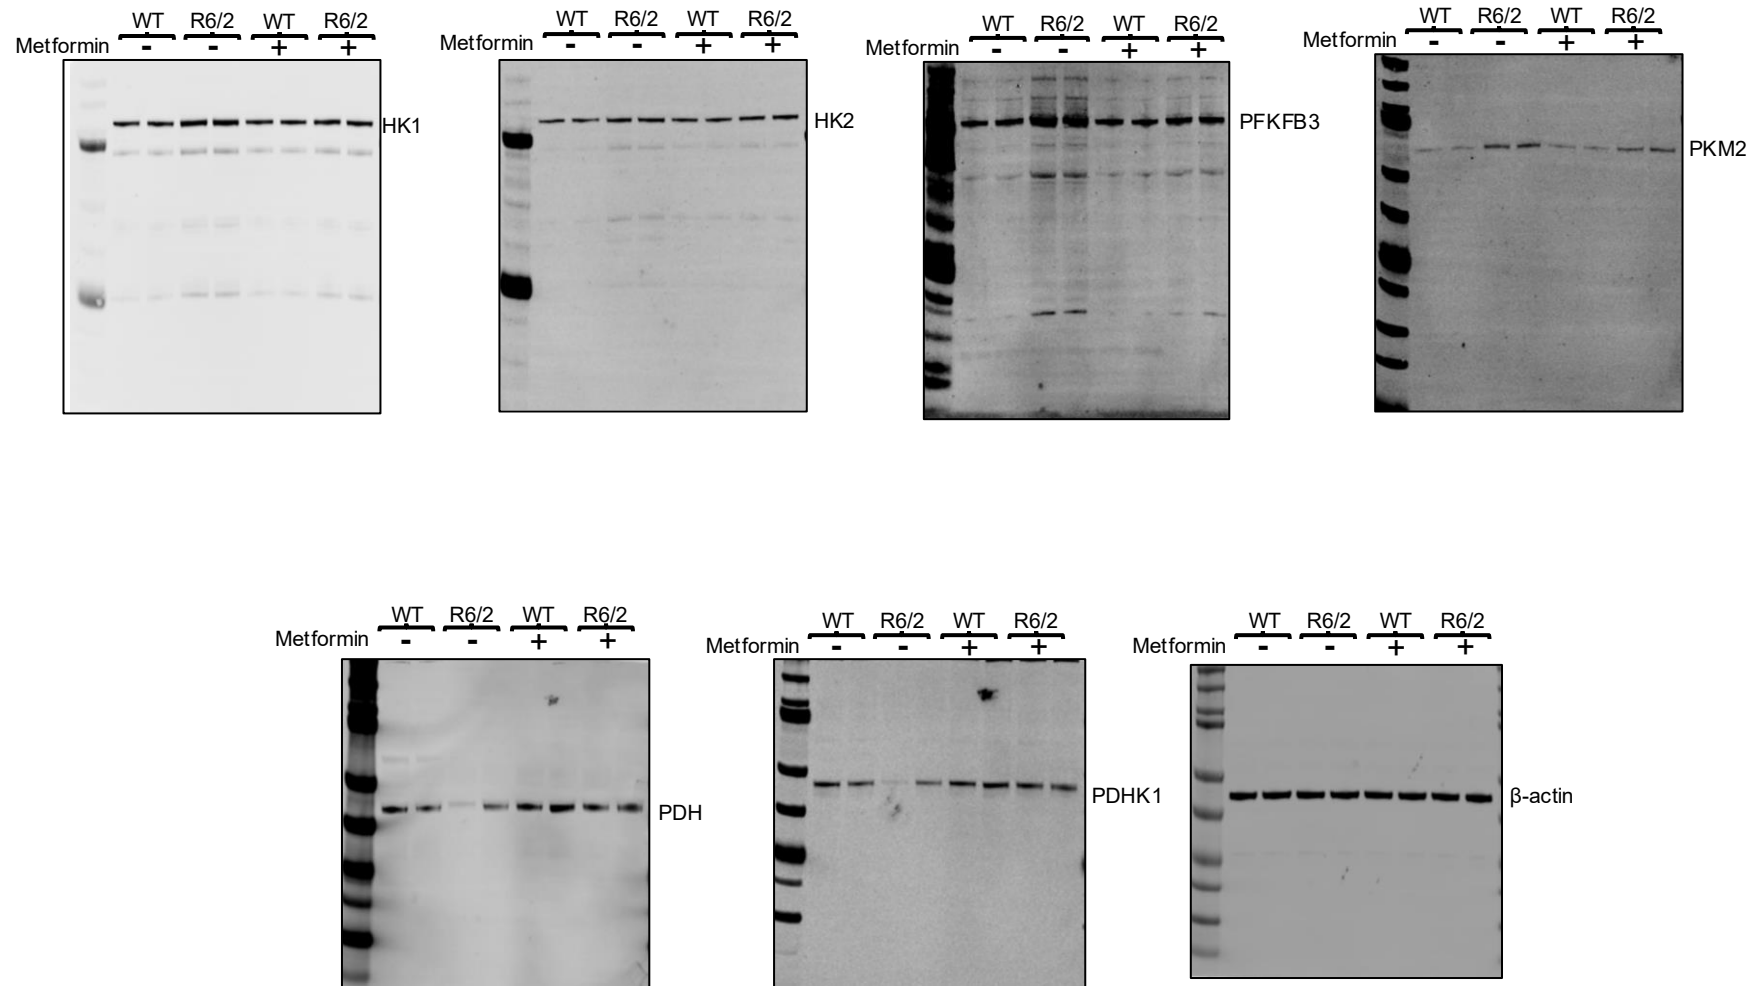

Figure 5A

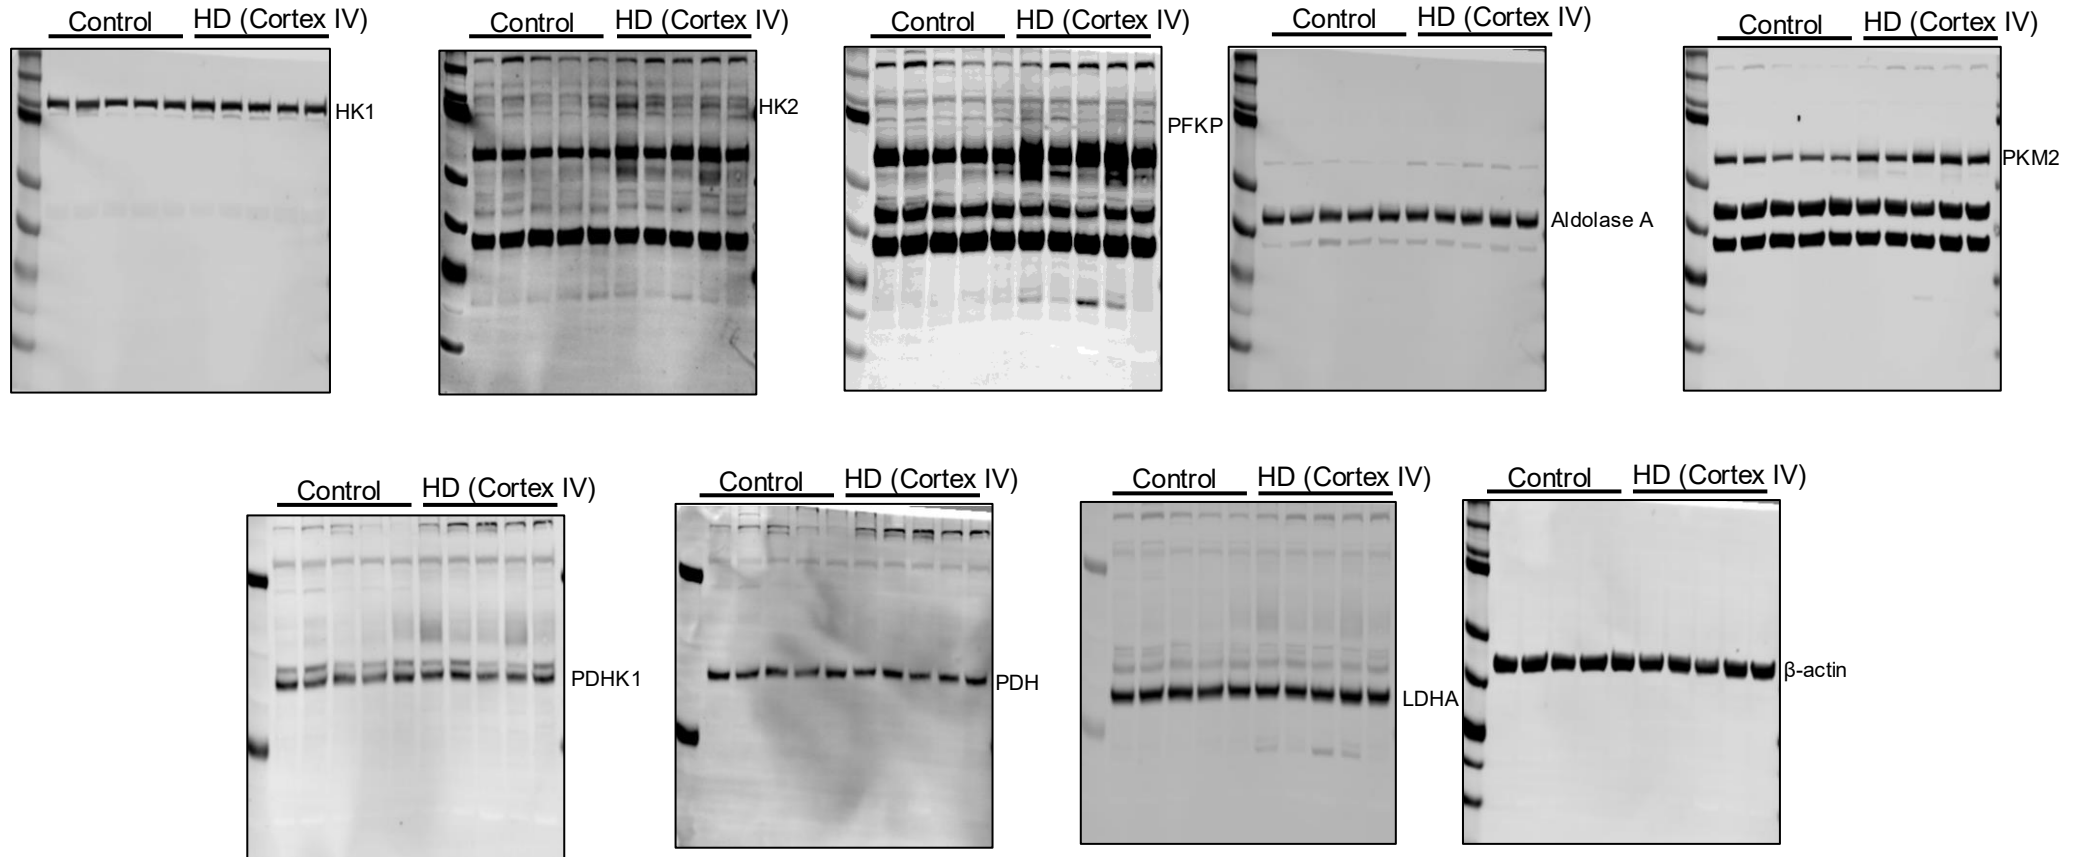

Figure 5C

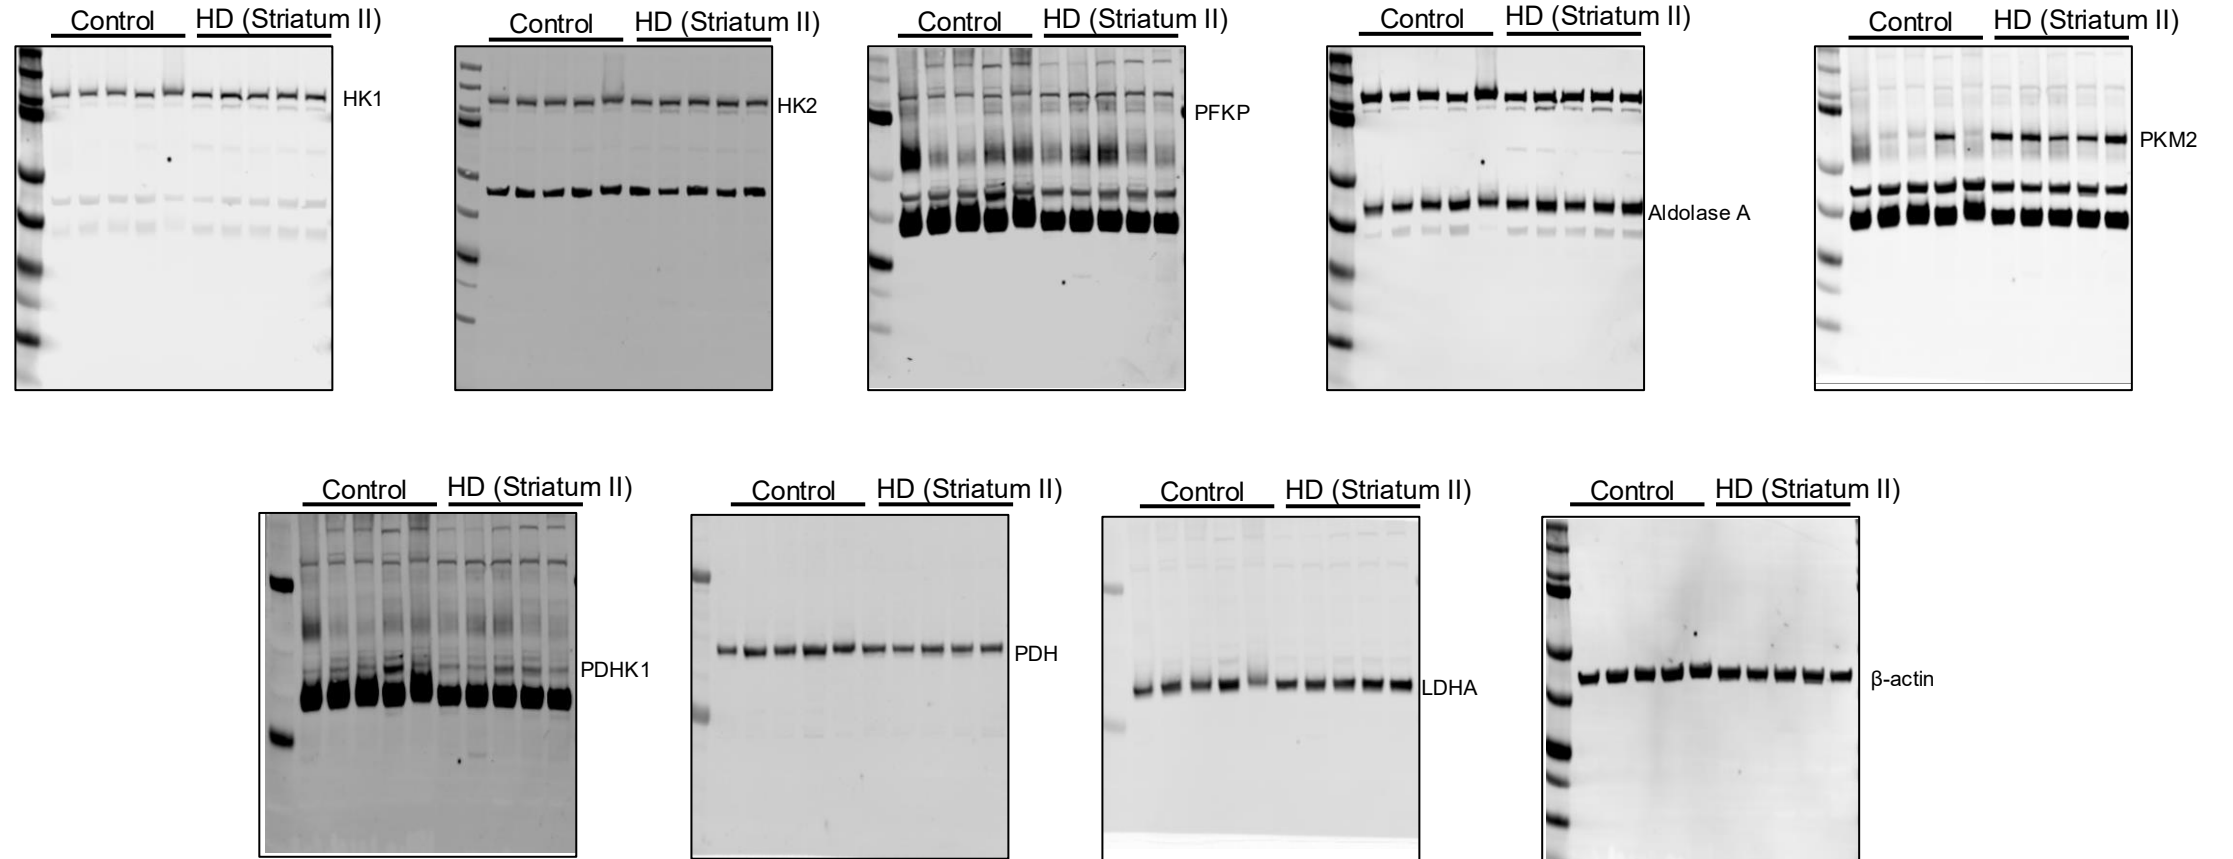

Figure 6E

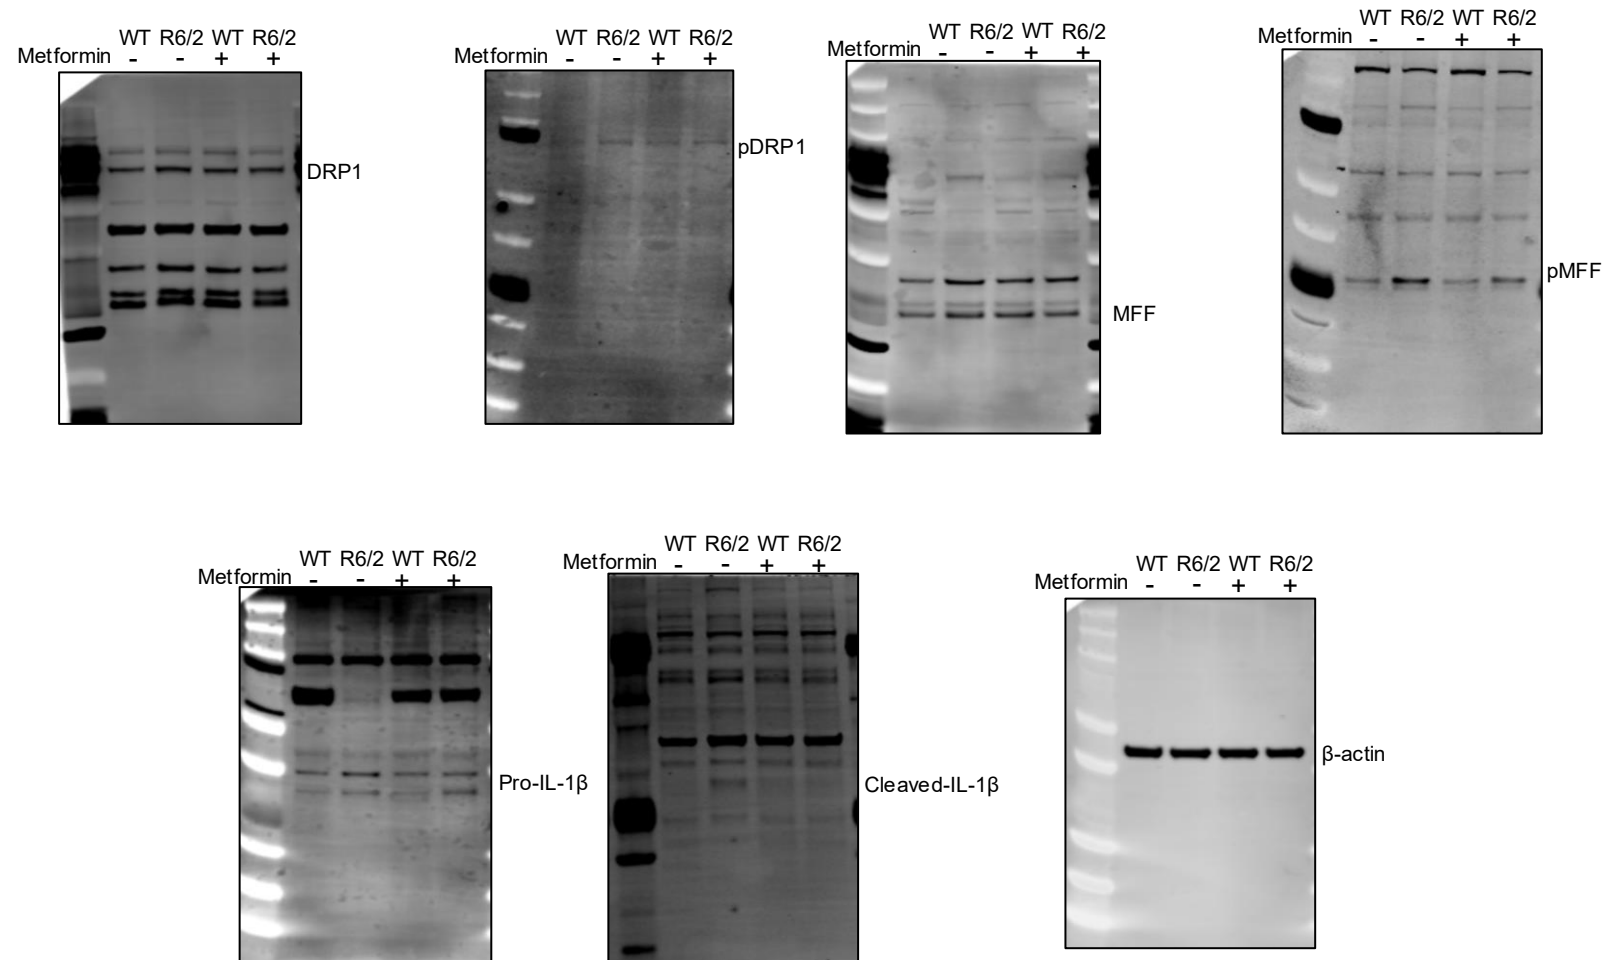

Supplement: sd2 [file 2]
